# Supplementary material
Source: publisher figshare collection journal article supplement (https://tandf.figshare.com/ndownloader/files/14502329)
Supplement: Supplementary file 1 [file 14502329]

**Supplementary Material**

**
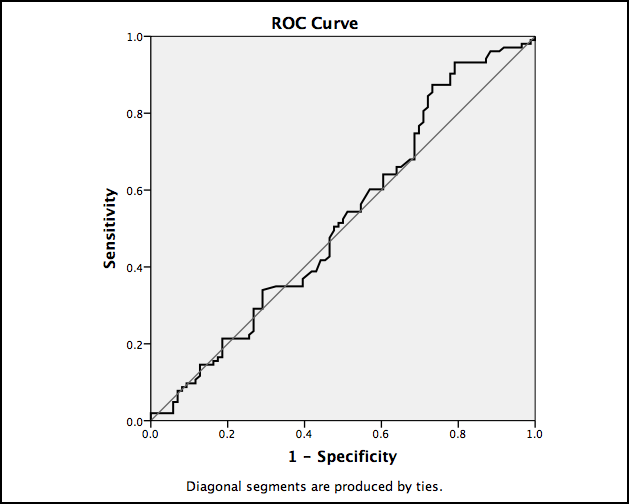
**

Receiver operating curve statistics (sensitivity and specificity) on the predictive utility of baseline-corrected heart rate variability (% change).
